# Supplementary material
Source: PubMed Central journal article supplement (PMC6264648)
Supplement: jci-128-97831-s321.pdf [file jci-128-97831-s321.pdf]

1 **Supplemental Materials and Methods**

2

3 **G $\alpha_{12}$  ablation exacerbates liver steatosis and obesity by suppressing**  
4 **USP22/SIRT1-regulated mitochondrial respiration**

5

6

7 *Tae Hyun Kim, Yoon Mee Yang, Chang Yeob Han, Ja Hyun Koo, Hyunhee Oh, Su Sung Kim, Byoung Hoon*  
8 *You, Young Hee Choi, Tae-Sik Park, Chang Ho Lee, Hitoshi Kurose, Mazen Nouredin, Ekihiro Seki, Yu-*  
9 *Jui Yvonne Wan, Cheol Soo Choi, and Sang Geon Kim*

10

## Supplementary Materials and Methods

11  
12  
13  
14  
15  
16  
17  
18  
19  
20  
21  
22  
23  
24  
25  
26  
27  
28  
29  
30  
31  
32

### *Materials*

Antibodies directed against G $\alpha_{12}$  (sc-409, sc-515445), IDE (sc-393887), and PGC1 (sc-13067) were purchased from Santa Cruz Biotechnology (Santa Cruz, CA). Antibody against G $\alpha_{12}$  (orb4561, for immunoblotting of human liver samples) was purchased from Biorbyt (Cambridge, UK). Anti-SIRT1 (8469), anti-SIRT3 (2627), anti-Akt (4685), anti-phospho Akt (Ser473) (9271), and anti-phospho Akt (Thr308) (9275) antibodies were supplied from Cell Signaling Technology (Danvers, MA), whereas anti-SIRT5 (ab78982) and anti-UCP1 (ab10983) antibodies were from Abcam (Cambridge, UK). Anti-HIF-1 $\alpha$  antibodies were purchased from either BD Biosciences Pharmingen (San Jose, CA) (610958) or Santa Cruz Biotechnology (sc-13515). Anti-USP22 antibody (NBP1-49644) was provided from Novus Biologicals (Littleton, CO). Anti- $\beta$ -actin antibody (A5441), anti-ubiquitin antibody (U0508), cycloheximide, erythro-9-(2-hydroxy-3-nonyl)adenine, dipyrindamole, C3 toxin (a8724), palmitate and bovine serum albumin were supplied from Sigma-Aldrich (St. Louis, MO). Horseradish peroxidase-conjugated goat anti-rabbit (G21234) and goat anti-mouse IgGs (G21240) were purchased from Invitrogen (Carlsbad, CA). Mouse anti-carnitine palmitoyl transferase-1 (CPT1) antibody (15184-1-AP) was supplied from Proteintech (Chicago, IL). Antibodies obtained from Santa Cruz Biotechnology were used at a ratio of 1:1000 dilution, whereas the others were done in 1:5000-10000 dilution. [ $^3$ H]-palmitate was obtained from Perkin-Elmer (Waltham, MA). MG132 and SP600125 (JNK inhibitor) were provided from Calbiochem (La Jolla, CA). Y-27632, N6-cyclopentyladenosine, and Cl-IB-MECA were purchased from Tocris Biosciences (Bristol, UK), whereas CGS-21680 and NECA were obtained from Sigma-Aldrich (St. Louis, MO).

### *Histological Analysis*

Paraffin-embedded liver, white adipose tissue, or brown adipose tissue sections were stained with hematoxylin and eosin for tissue morphology. Frozen liver tissues were stained with Oil red O for neutral TG and lipids.

37

### 38 ***Triglyceride Measurement***

39 Samples of mouse liver (0.3 g) were homogenized in 0.1 M Tris–acetate buffer (pH 7.4)  
40 containing 0.1 M potassium chloride and 1 mM EDTA. Six volumes of chloroform/methanol (2:1)  
41 were then added. After vigorous stirring, the mixtures were incubated on ice for 1 h and then  
42 centrifuged at 800 g for 3 min. The resulting lower phase was aspirated. The TG content was  
43 determined using Sigma Diagnostic Triglyceride Reagents (Sigma, St. Louis, MO) (1).

44

### 45 ***Serum Biochemical Analysis***

46 Serum alanine aminotransferase (ALT), aspartate aminotransferase (AST), lactate dehydrogenase  
47 (LDH) activities, TG, free fatty acid (FFA) and total cholesterol levels were analyzed using Spectrum,  
48 an automatic blood chemistry analyzer (Abbott Laboratories, Abbott Park, IL). Fasting glucose and  
49 insulin contents in serum were measured using Accu-Chek Active (Roche, Germany) and Ultra-  
50 Sensitive Mouse Insulin ELISA kits (Crystal Chem, Downers Grove, IL), respectively. C-Peptide,  
51 adiponectin, and leptin levels were assessed using Mouse C-Peptide ELISA, Mouse HMW & Total  
52 Adiponectin ELISA, and Mouse/Rat Leptin ELISA (Alpco Diagnostics, Salem, NH), respectively.  
53 Serum IL-6 and resistin were measured using Mouse IL-6 Quantikine ELISA kit and Mouse Resistin  
54 Quantikine ELISA kit (R&D Systems, Minneapolis, MN). Serum TNF $\alpha$  was determined using Mouse  
55 TNF alpha ELISA kit (Pierce, Rockford, IL).

56

### 57 ***Microarray Analysis***

58 Eight-week-old male WT and *Gna12* KO mice were maintained on normal chow diet (ND) and  
59 fasted overnight before sacrifice. Total RNA was extracted from three pairs of WT and *Gna12* KO  
60 mouse liver using RNeasy Mini kit (Qiagen, Valencia, CA) for hybridization to Agilent Whole Mouse  
61 Genome Microarray 8 $\times$ 60k platform (Agilent Technologies, Inc., Santa Clara, CA), as previously  
62 reported (2). Microarray data was normalized using GeneSpring GX software (Agilent Technologies).  
63 Among the genes differently expressed by *Gna12* KO, the candidate genes were narrowed down by

64 the criteria of  $P$  values  $< 0.05$  and a fold-change  $>2$ , and genes of interest were categorized into  
65 multiple biological pathways using Ingenuity Platform Analysis software. Gene ontology clustering  
66 analysis was performed using either PANTHER ver.11 (3) or DAVID 6.7 software (4, 5). Gene  
67 interaction analysis between the clustered genes was achieved according to STRING ver.9.1 database  
68 (6). Further visualization was done by Cytoscape 3.0.0 software (GEO accession code: GSE51694)  
69 (7).

70

### 71 ***Primary Hepatocyte Isolation and Cell Culture***

72 Mouse primary hepatocytes were isolated under the guidelines of the institutional animal use and  
73 care committee, as described previously (8). For cell lines, HepG2 and AML12 cells were purchased  
74 from American Type Culture Collection (Rockville, MD). WT or  $G\alpha_{12}$ -deficient mouse embryonic  
75 fibroblast (MEF) cells were kindly provided by Dr. Melvin I. Simon (California Institute of  
76 Technology, Pasadena, CA) (9). Min6 cells (a mouse insulinoma-derived cell line) were kindly  
77 provided by Dr. Eun Young Park (Mokpo National University, Mokpo, Korea). HepG2 and the MEF  
78 cells were maintained in the DMEM containing 10% FBS, 50 units/ml penicillin, and 50  $\mu\text{g/ml}$   
79 streptomycin, whereas AML12 cells were cultured in the DMEM/F-12 containing 10% FBS, insulin-  
80 transferrin-selenium X (ITSX), dexamethasone (40 ng/ml; Sigma), and the antibiotics. Min6 cells  
81 were grown in DMEM containing 15% FBS, 2.5 mM  $\beta$ -mercaptoethanol, 50 units/ml penicillin, and  
82 50  $\mu\text{g/ml}$  streptomycin. The cells with less than 20 passage numbers were used.

83

### 84 ***Measurement of Mitochondrial Oxygen Consumption Rate***

85 Oxygen consumption rate (OCR) was assessed using liver mitochondrial fractions prepared from  
86 WT or *Gna12* KO mice subjected to fasting overnight (10). After isolation of mitochondrial fractions,  
87 protein concentrations in each set of samples were assessed by the Bradford method, as reported  
88 previously (1). Mitochondrial OCR was calculated as an amount of oxygen consumed during a certain  
89 period of time normalized with protein contents for each sample using Clark-type electrode in a

90 continuously stirred sealed and thermostatically controlled chamber maintained at 37.8°C (Oxytherm  
91 System, Hansatech Instruments Ltd., Norfolk, UK).

92 For cell-based OCR assays, AML12 cells were infected with Ad-SIRT1 (or Ad-Con) for 16 h and  
93 seeded in XF96 microplates at 20,000 cells per well. One hour prior to the assay, cells were washed  
94 with XF assay base medium and placed into non-CO<sub>2</sub> incubator maintained at 37°C. OCR was  
95 measured using XFe96 Extracellular Flux Analyzer (Seahorse Bioscience) according to the  
96 manufacturer's instruction. In addition to the basal respiration, several parameters of mitochondrial  
97 respiration were assessed by sequential additions of oligomycin (1 μM, ATP synthase inhibitor),  
98 FCCP (1 μM, chemical uncoupler), and rotenone plus antimycin A (0.5 μM each, Complex I and III  
99 inhibitors, respectively).

100

#### 101 ***Palmitate β-Oxidation***

102 Primary hepatocytes were isolated and seeded at a density of 5×10<sup>5</sup> per well in 12 well-plates.  
103 Palmitate oxidation was measured according to the published methods (11, 12). Briefly, hepatocytes  
104 were maintained in a medium supplemented with [9,10-<sup>3</sup>H]palmitate complexed to BSA by vortexing  
105 a mixture of the palmitate and a 10% BSA solution at a 1:2 volume ratio. A total of 3.3 μl [9,10-  
106 <sup>3</sup>H]palmitate and 6.7 μl BSA were used per 1 ml of cell culture medium. After cell culture in a 12-well  
107 plate for 24 h, supernatant was applied to ion-exchange column (Dowex 1×8-200, Sigma), and  
108 tritiated water was recovered by eluting with 2.5 ml H<sub>2</sub>O. A 0.75-ml aliquot was used for scintillation  
109 counting.

110

#### 111 ***Hydrodynamic Injection of Plasmid in Mice***

112 For the in vivo experiments, shRNA-expressing plasmid against mouse Gα<sub>12</sub> (sh-Gα<sub>12</sub>) and non-  
113 targeting control luciferase (sh-Luci) (2, 13) were prepared using Endofree-plasmid mega kit (Qiagen,  
114 Hilden, Germany). After 1 week of acclimation, 8-week-old C57BL/6 mice were hydrodynamically  
115 injected with sh-Gα<sub>12</sub> or sh-Luci plasmid DNA (50 μg each plasmid) through tail vein. In another

116 experiment, a plasmid encoding for USP22 (Addgene plasmid #22575, a gift from Dr. Wade Harper)  
117 (14) or control plasmid (MSCV-GFP) was prepared in an identical procedure. WT and *Gna12* KO  
118 mice at 12 weeks of age were hydrodynamically injected with USP22 or control plasmid DNA (30 µg  
119 each) via tail vein. For both experiments, a total volume equivalent to 10% of the mouse body weight  
120 in PBS was delivered within 5-7 seconds. Five days after the injection, ad libitum-feeding or fasting  
121 for 24 h was conducted as described in the Materials and Methods.

122

### 123 ***Target Gene Delivery***

124 Adenovirus encoding for mouse  $G\alpha_{12}^{QL}$  (Q229L) was kindly provided from Dr. Patrick J. Casey  
125 (Duke University Medical Center, Durham, NC). For lentivirus encoding  $G\alpha_{12}$ , the mouse albumin  
126 enhancer/promoter (NB) construct was kindly provided by Dr. Richard D. Palmiter (University of  
127 Washington) (15). The original EF1 promoter of pCDH-EF1-MCS-copGFP plasmid (System  
128 Biosciences) was replaced with the albumin enhancer/promoter. The coding region of pcDNA3- $G\alpha_{12}$ ,  
129 a gift from Dr. Danny N. Dhanasekaran (The University of Oklahoma Health Sciences Center), was  
130 extracted and cloned downstream of the albumin enhancer/promoter. The constructs were sequenced  
131 to assess the integrity of insert. HEK293T cells were co-transfected with the plasmids and packaging  
132 vectors to generate viral particles. For in vivo experiments, 100 µl of  $1.5 \times 10^7$  TU was administered to  
133 8-week-old C57BL/6 mice via tail vein. For SIRT1 overexpression in vivo, adenovirus expressing  
134 mouse SIRT1 (Ad-SIRT1,  $2.8 \times 10^9$  PFU/mouse) (Vector Biolabs, Philadelphia, PA) was injected to  
135 15-week-old male WT or *Gna12* KO mice via tail vein. Ad-SIRT1 used for in vitro experiments was  
136 generously provided by Dr. Junichi Sadoshima (Rutgers New Jersey Medical School, Newark, NJ).  
137 For both in vitro and in vivo assays using adenovirus, Ad-GFP was used as an infection control.

138

### 139 ***Palmitate Preparation and Treatment***

140 Palmitate solution (final concentration at 1 mM) was prepared as previously described (1). After  
141 serum starvation overnight, primary hepatocytes isolated from *Gna12* KO mice were incubated with

142 500  $\mu$ M palmitate for 18 h. The cells were then washed with PBS, fixed with 10% formalin for 1 h,  
143 and stained with Oil Red O prior to visual inspection (16). For immunoblotting assays, cells were  
144 treated with 500  $\mu$ M palmitate for 24 h (Min6 cells) or 36 h (AML12 cells).

145

#### 146 *MTT Assays*

147 AML12 cells were used to assess palmitate-induced cytotoxicity using MTT assays, as described  
148 previously (17). Briefly, the cells seeded at a density of  $1 \times 10^5$  cells per well in a 48-well plate were  
149 cultured until 70-80% confluency. Cells were treated with 500  $\mu$ M palmitate for 48 h, and viable cells  
150 were stained with MTT reagent (Sigma, 0.25 mg/ml for 1-2 h). After the removal of culture media, the  
151 formazan crystals produced in the wells were dissolved in DMSO to measure the absorbance at 590  
152 nm using a microplate reader (SpectraMax I3X, Molecular Devices, Sunnyvale, CA).

153

#### 154 *Insulin Secretion Assay*

155 Min6 cells infected with either Ad-G $\alpha_{12}$ QL or Ad-Con were transferred and cultured in 48 well-  
156 plate until 80-90% confluency. The cells were treated with 500  $\mu$ M palmitate for 24 h in the presence  
157 or absence of chemical JNK inhibitor (SP600125, 20  $\mu$ M), followed by incubation for 1 h with Krebs-  
158 Ringer bicarbonate HEPES (KRBH) buffer without FBS prior to stimulation with high glucose (25  
159 mM) in the same KRBH buffer. After high glucose stimulation for 1 h, 100  $\mu$ l of the supernatant was  
160 collected and stored in a deep freezer at  $-70^{\circ}\text{C}$  until use. The medium was diluted 1:40 with KRBH  
161 buffer without BSA and analyzed for insulin content using an Ultrasensitive Mouse Insulin ELISA kit  
162 (Crystal Chem, Downers Grove, IL) according to the manufacturer's instruction. The content of  
163 insulin secreted into the culture media for each sample was normalized to cellular protein  
164 concentration.

165

#### 166 *Analysis of Energy Balance*

167 Food consumption, energy expenditure, respiratory quotient, oxygen consumption, and locomotor

168 activity were assessed in a metabolic monitoring system (CLAMS: Columbus Instruments) for 4 days  
169 (3 days of acclimation followed by 1 day measurement) prior to (9-week-old) and after 4 weeks (13-  
170 week-old) of HFD feeding. Locomotor activity was measured by counting the number of infrared  
171 beam breaks on x- and z-axes during the measurement period, as previously described (18). Rectal  
172 temperature was measured using a MSR Digital Thermometer (Measure Technology, Taipei Hsien,  
173 Taiwan).

174

### 175 *Glucose Tolerance and Insulin Tolerance Tests*

176 Mice fed HFD for 13 weeks were fasted overnight and then gavaged with glucose (2 g/kg body  
177 weight) for glucose tolerance test. After two weeks of recovery with HFD supplementation, the mice  
178 were fasted for 4 h and received an intraperitoneal injection of insulin (Humalog, 0.75 IU/kg body  
179 weight) for insulin tolerance test. For each experiment, blood samples were taken from tail vein and  
180 blood glucose levels in the samples were measured using an Accu-Check glucometer (Roche) at 0, 30,  
181 60, and 120 min after treatment. Experiments were repeated twice and similar results were obtained.

182

### 183 *Hyperinsulinemic-Euglycemic Clamp Study*

184 Seven days prior to the hyperinsulinemic-euglycemic clamp studies, indwelling catheters were  
185 placed into the right internal jugular vein extending to the right atrium. After fasting overnight, [3-  
186 <sup>3</sup>H]glucose (HPLC purified, PerkinElmer) was infused at a rate of 0.05  $\mu$ Ci/min for 2 h to assess the  
187 basal glucose turnover, and a hyperinsulinemic-euglycemic clamp in awake mice was conducted for  
188 140 min with a primed/continuous infusion of human insulin (126 pmol/kg prime, 18 pmol/kg/min  
189 infusion) (Eli Lilly). During the clamp, plasma glucose was maintained at basal concentrations (~6.7  
190 mM). Rates of basal and insulin-stimulated whole-body glucose fluxes and tissue glucose uptake were  
191 determined after a bolus (10  $\mu$ Ci) injection of 2-deoxy-D-[1-<sup>14</sup>C]glucose (2-DOG) (PerkinElmer), as  
192 previously described (18).

193



194 ***Lipidomics Analyses***

195 For lipid analyses, internal standards (C17:0 cer, C19: 0–19:0 DAG, or C17:0 acyl-CoA,  
196 respectively) were added to plasma (1 mM, 20 µl each) or liver homogenates (20 mg each) samples.  
197 Ceramide was extracted from the samples by addition of chloroform and methanol (2:1), as described  
198 previously (19); collected organic phase was evaporated under N<sub>2</sub> gas and the residue was  
199 reconstituted in 100 µl 0.1% formic acid in methanol, and was subjected to LC/MS/MS analysis.  
200 Separately, the lipid extract was run on silica thin-layer chromatography. Phospholipids were scraped  
201 and the composition of FAs and phospholipids was measured using GC/MS technique (20). For  
202 analyses of sphingolipid, electrospray ionization mode was used in the positive mode as described  
203 previously (21, 22).

204

205 ***Human Samples***

206 The NAFLD liver specimens were obtained from the University of Kansas Liver Center Tissue  
207 Bank between 2010 and 2011 (cohort #1) and Division of Digestive and Liver Diseases, Department  
208 of Medicine, Comprehensive Transplant Center, Cedars-Sinai Medical Center in 2017 (cohort #2). All  
209 of the procured specimens received proper patient consents with approval from each Institutional  
210 Review Board (#00042709 for cohort #2). For cohort #1, the subjects included 17 males and 16  
211 females, at the average age of 51.1±2.4 and the liver biopsies from those diagnosed with normal  
212 (n=15), steatosis (n=12) or steatohepatitis (n=6) were analyzed. For cohort #2, the liver specimens,  
213 being reviewed and scored using H&E-stained sections by pathologists in a blinded fashion, from  
214 subjects with clinical diagnosis of normal (n=5), simple steatosis (n=3) or NASH (n=2) were analyzed  
215 for immunoblottings.

216

217 ***Adenosine Measurements***

218 To obtain the serum and liver homogenate samples from mice, as much blood as possible was  
219 collected via the heart puncture, and each mouse was then sacrificed by cervical dislocation. Liver

220 was excised, weighed and homogenized with a 4-fold volume of normal saline. After centrifugation  
221 for 10 min, the supernatant was collected. Adenosine concentrations in sera or liver homogenates  
222 were measured using UPLC-MS/MS, as previously described with modifications (23). A 30  $\mu$ l serum  
223 and liver samples were used for the sample preparation steps. A 60  $\mu$ l of 50 ng/ml phenacetin in  
224 acetonitrile was added as an internal standard to each serum or liver homogenate sample. After  
225 centrifuging at 12,000 rpm for 10 min, a 5  $\mu$ l of the supernatant was injected onto UPLC-MS/MS  
226 system. To extinguish the endogenous adenosine and measure the spiked concentration of exogenous  
227 adenosine in sera and liver homogenates, the samples were kept for 24 h at room temperature to  
228 completely degrade endogenous adenosine, and then a known concentration of adenosine and ADA  
229 inhibitors [100  $\mu$ M of dipyridamole and 2.5  $\mu$ M of erythro-9-(2-hydroxy-3-nonyl)adenine] were  
230 added. Quantitation was achieved by MS/MS detection using Waters UPLC-XEVO TQ system  
231 (Waters Corporation, Milford). The mass transitions for adenosine and phenacetin were  $m/z$  268.01  $\rightarrow$   
232 135.86 (collision energy, 15 eV) and 179.96  $\rightarrow$  110.01 (20 eV), respectively, in the multiple reaction  
233 monitoring (MRM) mode with positive ionization. These compounds were separated on a reversed-  
234 phase C<sub>18</sub> column (ACQUITY UPLC 2.1 mm  $\times$  100 mm i.d., 1.7- $\mu$ m particle size; Waters, Ireland)  
235 with a flow rate of 0.3 ml/min. The mobile phase composition was started at 10:90 (v/v) of  
236 acetonitrile and distilled water containing 0.1% formic acid and gradually changed to 90:10 (v/v) for 2  
237 min, and held 2.5 min, and then switched back to 10:90 (v/v) for 2.6 to 4.5 min.

238

### 239 ***Transient Transfection***

240 Scrambled control siRNA, or siRNA specifically directed against G $\alpha_{12}$ , HIF-1 $\alpha$ , and USP22 were  
241 purchased from Santa Cruz Biotechnology (Santa Cruz, CA). The transfection with siRNA (100 nM)  
242 was carried out using FuGENE<sup>®</sup> HD Reagent (Roche, Indianapolis, IN) in accordance with  
243 manufacturer's procedure.

244

### 245 ***Establishment of Stable Cell Lines***

246 To generate G $\alpha_{12}$ -depleted stable cell lines, either shRNA-expressing plasmid against mouse G $\alpha_{12}$

247 (sh-G $\alpha_{12}$ ) or non-targeting luciferase as a control (sh-Luci) was transfected into AML12 cells using  
248 FuGENE<sup>®</sup> HD Reagent (Roche, Indianapolis, IN) in accordance with manufacturer's procedure, and  
249 stably transfected cells were selected using puromycin (2  $\mu$ g/ml, Thermo Fisher Scientific, Logan, UT)  
250 (2).

251

### 252 ***RNA Isolation and qRT-PCR Assays***

253 Total RNA was extracted using Trizol (Invitrogen, Carlsbad, CA) and was reverse-transcribed.  
254 The resulting cDNA was amplified by qRT-PCR as previously described (2).  $\beta$ -Actin or GAPDH was  
255 used as normalization control. The primer sequences used for qRT-PCR assays were provided in  
256 Supplemental Table 1.

257

### 258 ***Immunoblot Analysis***

259 SDS-polyacrylamide gel electrophoresis and immunoblot analyses were performed according to  
260 previously published procedures (1).

261

### 262 ***Immunoprecipitation Assay***

263 To assess SIRT1 ubiquitination, HepG2 cells were infected with Ad-G $\alpha_{12}$ QL (or Ad-Con) for 6 h,  
264 followed by subsequent transfection with a plasmid encoding His-tagged ubiquitin (His-Ubi) in  
265 Eagle's minimum essential medium containing 1% fetal bovine serum (FBS) for 24 h, and  
266 continuously incubated with 20  $\mu$ M MG132 for 6 h. Cell lysates were incubated with anti-SIRT1  
267 antibody overnight at 4°C. After immunoprecipitation, the antigen-antibody complex was precipitated  
268 following incubation for 2 h at 4°C with protein G-agarose. The immune complex was solubilized in  
269 2 $\times$ Laemmli buffer and boiled for 5 min. The samples were immunoblotted with anti-ubiquitin  
270 antibody.

271

### 272 ***Reporter Gene Assays***

273 The upstream promoter region of mouse *Usp22* gene containing up to -2.2 kb was cloned into the  
274 pGL3 luciferase vector. A mutation of HRE in the mouse gene was done by deleting the sequence of  
275 putative HIF-1 $\alpha$  binding element (5'-(A/G)CGTG-3') located between -539 bp and -535 bp (Mut1);  
276 or between -287 bp and -283 bp (Mut2), respectively. Cells were transfected with pGL3-USP22 for 12  
277 h with either Mock or G $\alpha_{12}$ QL plasmid in the presence of FuGENE<sup>®</sup> HD reagent, and luciferase  
278 activity was measured by adding luciferase assay reagent (Promega, Madison, WI).

279

### 280 *Statistics*

281 Values are expressed as mean $\pm$  standard error of mean (SEM). Statistical significance was tested  
282 by two-tailed Student's *t* test or 1-way ANOVA with Bonferroni or Least Significant Difference (LSD)  
283 multiple comparison procedure where appropriate. Differences were considered significant at *P* <  
284 0.05.

285

286

## Supplementary References

287  
288  
289  
290  
291  
292  
293  
294  
295  
296  
297  
298  
299  
300  
301  
302  
303  
304  
305  
306  
307  
308  
309  
310  
311  
312  
313  
314  
315  
316  
317  
318  
319  
320  
321  
322  
323  
324

1. Kim TH, et al. An active metabolite of oltipraz (M2) increases mitochondrial fuel oxidation and inhibits lipogenesis in the liver by dually activating AMPK. *Br J Pharmacol.* 2013;168(7):1647-1661.
2. Yang YM, et al. Galpha12 gep oncogene deregulation of p53-responsive microRNAs promotes epithelial-mesenchymal transition of hepatocellular carcinoma. *Oncogene.* 2015;34(22):2910-2921.
3. Mi H, et al. PANTHER version 11: expanded annotation data from Gene Ontology and Reactome pathways, and data analysis tool enhancements. *Nucleic Acids Res.* 2017;45(D1):D183-d189.
4. Huang da W, et al. Bioinformatics enrichment tools: paths toward the comprehensive functional analysis of large gene lists. *Nucleic Acids Res.* 2009;37(1):1-13.
5. Huang da W, et al. Systematic and integrative analysis of large gene lists using DAVID bioinformatics resources. *Nat Protoc.* 2009;4(1):44-57.
6. Franceschini A, et al. STRING v9.1: protein-protein interaction networks, with increased coverage and integration. *Nucleic Acids Res.* 2013;41(Database issue):D808-815.
7. Shannon P, et al. Cytoscape: a software environment for integrated models of biomolecular interaction networks. *Genome Res.* 2003;13(11):2498-2504.
8. Yang YM, et al. Decrease of microRNA-122 causes hepatic insulin resistance by inducing protein tyrosine phosphatase 1B, which is reversed by licorice flavonoid. *Hepatology.* 2012;56(6):2209-2220.
9. Vogt S, et al. Receptor-dependent RhoA activation in G12/G13-deficient cells: genetic evidence for an involvement of Gq/G11. *J Biol Chem.* 2003;278(31):28743-28749.
10. Frezza C, et al. Organelle isolation: functional mitochondria from mouse liver, muscle and cultured fibroblasts. *Nat Protoc.* 2007;2(2):287-295.
11. Deberardinis RJ, et al. Phosphatidylinositol 3-kinase-dependent modulation of carnitine palmitoyltransferase 1A expression regulates lipid metabolism during hematopoietic cell growth. *J Biol Chem.* 2006;281(49):37372-37380.
12. Buzzai M, et al. The glucose dependence of Akt-transformed cells can be reversed by pharmacologic activation of fatty acid beta-oxidation. *Oncogene.* 2005;24(26):4165-4173.
13. Shin KJ, et al. A single lentiviral vector platform for microRNA-based conditional RNA interference and coordinated transgene expression. *Proc Natl Acad Sci U S A.* 2006;103(37):13759-13764.
14. Sowa ME, et al. Defining the human deubiquitinating enzyme interaction landscape. *Cell.* 2009;138(2):389-403.
15. Pinkert CA, et al. An albumin enhancer located 10 kb upstream functions along with its promoter to direct efficient, liver-specific expression in transgenic mice. *Genes Dev.*

325 1987;1(3):268-276.

326 16. Yang YM, et al. Metadoxine, an ion-pair of pyridoxine and L-2-pyrrolidone-5-carboxylate,  
327 blocks adipocyte differentiation in association with inhibition of the PKA-CREB pathway. *Arch*  
328 *Biochem Biophys.* 2009;488(2):91-99.

329 17. Wu HM, et al. Mitigation of carbon tetrachloride-induced hepatic injury by methylene blue, a  
330 repurposed drug, is mediated by dual inhibition of GSK3beta downstream of PKA. *Br J*  
331 *Pharmacol.* 2014;171(11):2790-2802.

332 18. Kim KH, et al. Autophagy deficiency leads to protection from obesity and insulin resistance by  
333 inducing Fgf21 as a mitokine. *Nat Med.* 2013;19(1):83-92.

334 19. Bligh EG, and Dyer WJ. A rapid method of total lipid extraction and purification. *Can J*  
335 *Biochem Physiol.* 1959;37(8):911-917.

336 20. Magnes C, et al. LC/MS/MS method for quantitative determination of long-chain fatty acyl-  
337 CoAs. *Anal Chem.* 2005;77(9):2889-2894.

338 21. Yoo HH, et al. Liquid chromatography-tandem mass spectrometric determination of  
339 ceramides and related lipid species in cellular extracts. *J Chromatogr B Analyt Technol*  
340 *Biomed Life Sci.* 2006;843(2):327-333.

341 22. Lee SY, et al. Activation of sphingosine kinase 2 by endoplasmic reticulum stress ameliorates  
342 hepatic steatosis and insulin resistance in mice. *Hepatology.* 2015;62(1):135-146.

343 23. Sharma K, et al. Highly sensitive method for the determination of adenosine by LC-MS/MS-  
344 ESI: method validation and scope of application to a pharmacokinetic/pharmacodynamic  
345 study. *Biomed Chromatogr.* 2012;26(1):81-88.

346

347

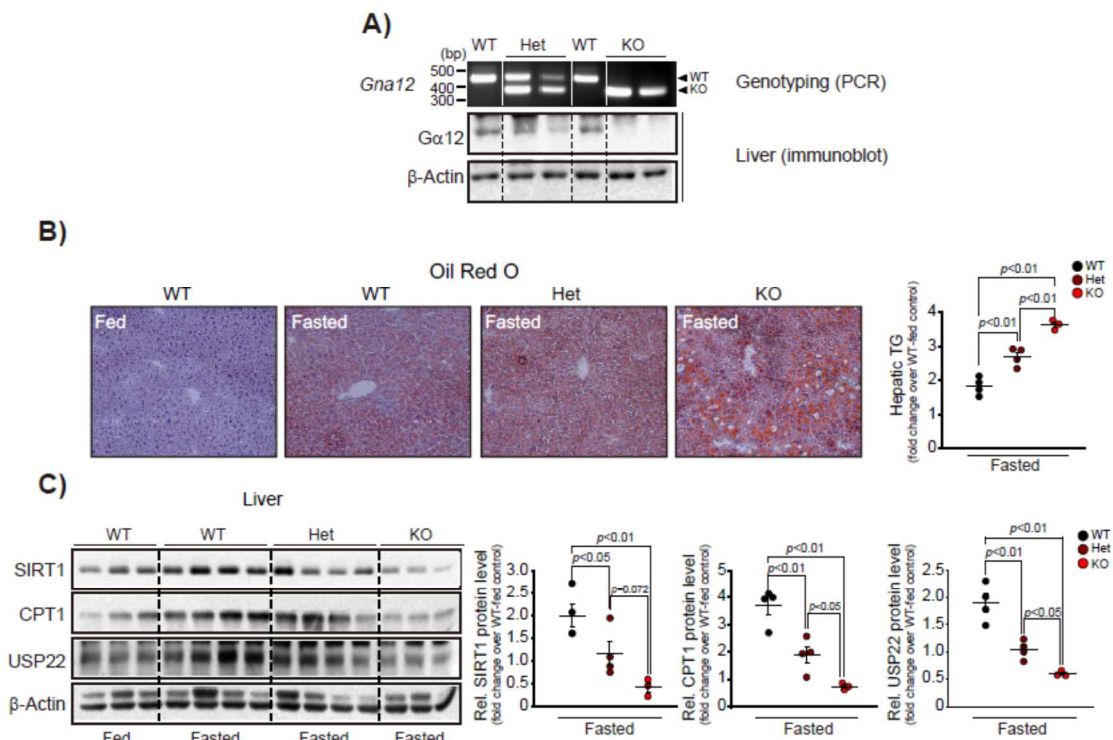

Fig. S1

348

349 **Supplemental Figure 1. The partial phenotype of heterozygous for *Gna12* deficiency on SIRT1**  
 350 **induction and hepatic steatosis by fasting**

351 (A) PCR analysis for *Gna12* in genomic DNA isolated from the tails of WT (littermates),  
 352 heterozygous for *Gna12* deficiency (Het), and *Gna12* KO mice (upper). Immunoblotting assay for  
 353  $G\alpha_{12}$  was done using liver homogenates prepared from same mice (lower).

354 (B) Representative Oil Red O staining (left, original magnification  $\times 20$ ), and TG contents (right) in  
 355 the liver tissues. Mice at 14 weeks of age were subjected to fasting for 24 h (n=3-4/group).

356 (C) The effect of heterozygous deletion of *Gna12* on fasting induction of SIRT1. Immunoblottings for  
 357 SIRT1, CPT1, and USP22 (left) in the liver homogenates from the above mice, and their respective  
 358 quantifications (right) (n=3-4/group).

359 Values represent the mean  $\pm$  SEM. Data were analyzed by ANOVA followed by Bonferroni (B) or  
 360 LSD (C) post hoc tests. For B and C, only fasted groups were analyzed for ease of data presentation.

361 For A and B, the blots in each panel were run in parallel using same samples and  $\beta$ -actin was used as a  
 362 normalization control for densitometric analysis.

363

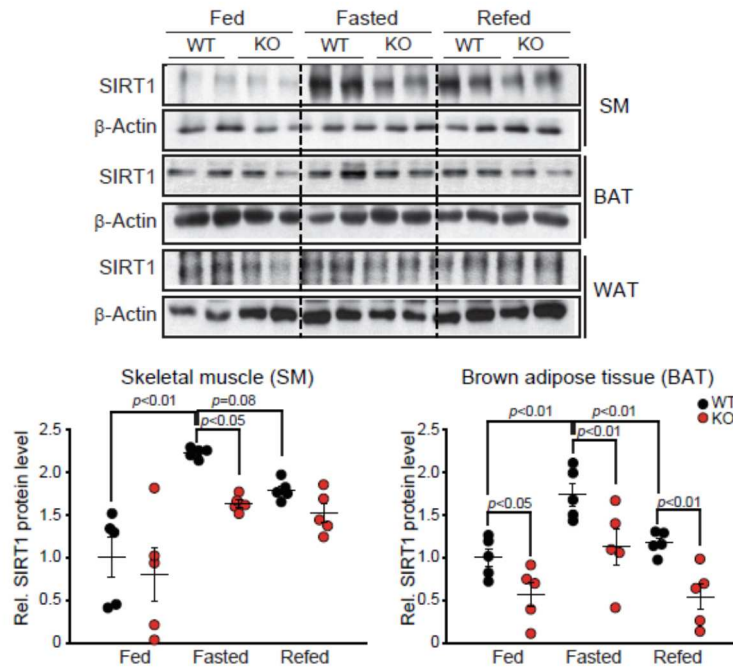

Fig. S2

365

366 **Supplemental Figure 2. Lack of adaptive SIRT1 induction by fasting in extrahepatic tissues of**  
 367 ***Gna12* KO mice**

368 Abrogation of SIRT1 induction upon fasting by *Gna12* KO. Immunoblottings for SIRT1 were done on  
 369 the homogenates of skeletal muscle (SM), brown adipose tissue (BAT), or white adipose tissue (WAT)  
 370 from 12-week-old mice fed ND ad libitum, followed by fasting and re-feeding for 24 h (n=5/group).

371 Values represent the mean  $\pm$  SEM. Data were analyzed by ANOVA followed by LSD post hoc test.  
 372 The blots were run in parallel using same samples and  $\beta$ -actin was used as a normalization control for  
 373 densitometric analysis.

374

375

376



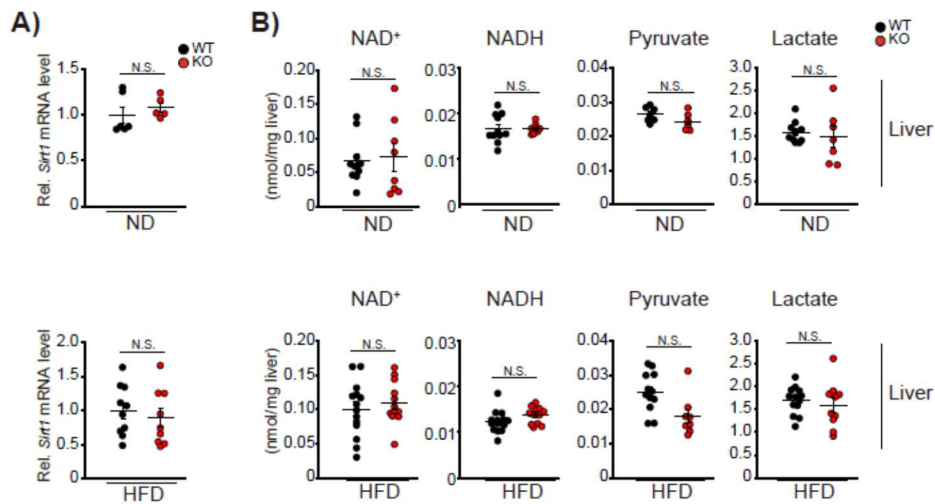

Fig.S3

377

378

379 **Supplemental Figure 3. The effects of *Gna12* KO on SIRT1 regulation**

380 (A) qRT-PCR assays for *Sirt1* in the liver of WT or *Gna12* KO mice fed either ND (upper) or HFD  
 381 (lower) (n=5-10/group).

382 (B) The contents of NAD<sup>+</sup>, NADH, pyruvate, and lactate in the liver of mice as described in A (n=6-  
 383 14/group).

384 For A and B, values represent mean ± SEM. N.S., not significant

385

386

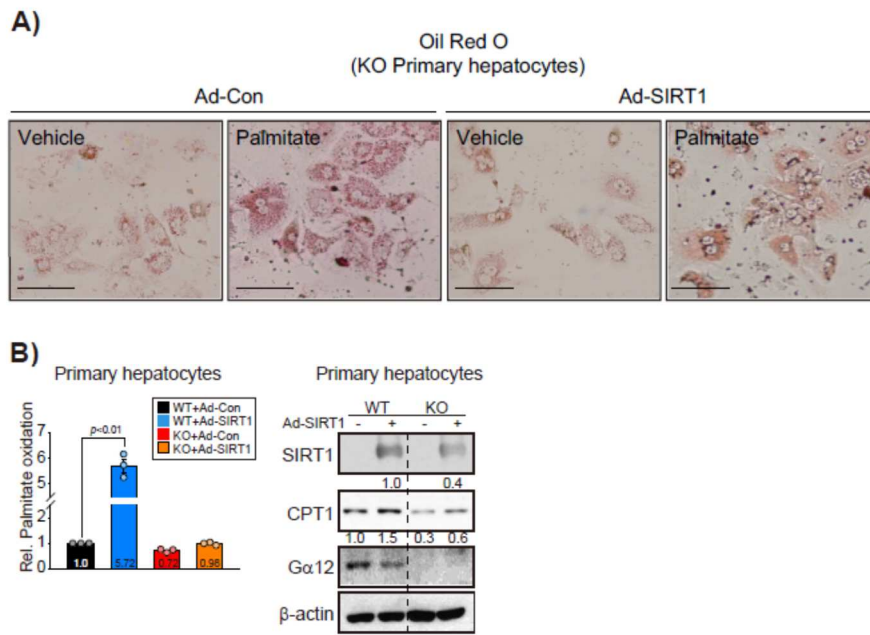

Fig.S4

387

388 **Supplemental Figure 4. The effect of SIRT1 overexpression on lipid accumulated in *Gna12* KO**  
 389 **hepatocytes**

390 (A) Representative Oil Red O staining in *Gna12* KO primary hepatocytes (n=2-3/group). After  
 391 infection with Ad-SIRT1 (or Ad-Con) for 10 h, the cells were treated with 500 μM palmitate (or BSA  
 392 control) for 18 h. Scale bar, 50 μm

393 (B) Palmitate oxidation in primary hepatocytes. The [<sup>3</sup>H]-palmitate oxidation rate was determined in  
 394 WT or *Gna12* KO primary hepatocytes infected with Ad-SIRT1 (or Ad-Con) as in A (left, n=3; values  
 395 indicate mean). Immunoblottings for SIRT1 and CPT1 were done using the lysates prepared from the  
 396 assay (right; the values were shown as relative band intensity). The blots were run in parallel using  
 397 same samples and β-actin was used as a normalization control for densitometric analysis.

398 For B, values represent mean ± SEM. Data was analyzed by ANOVA followed by LSD post hoc test.

399

400

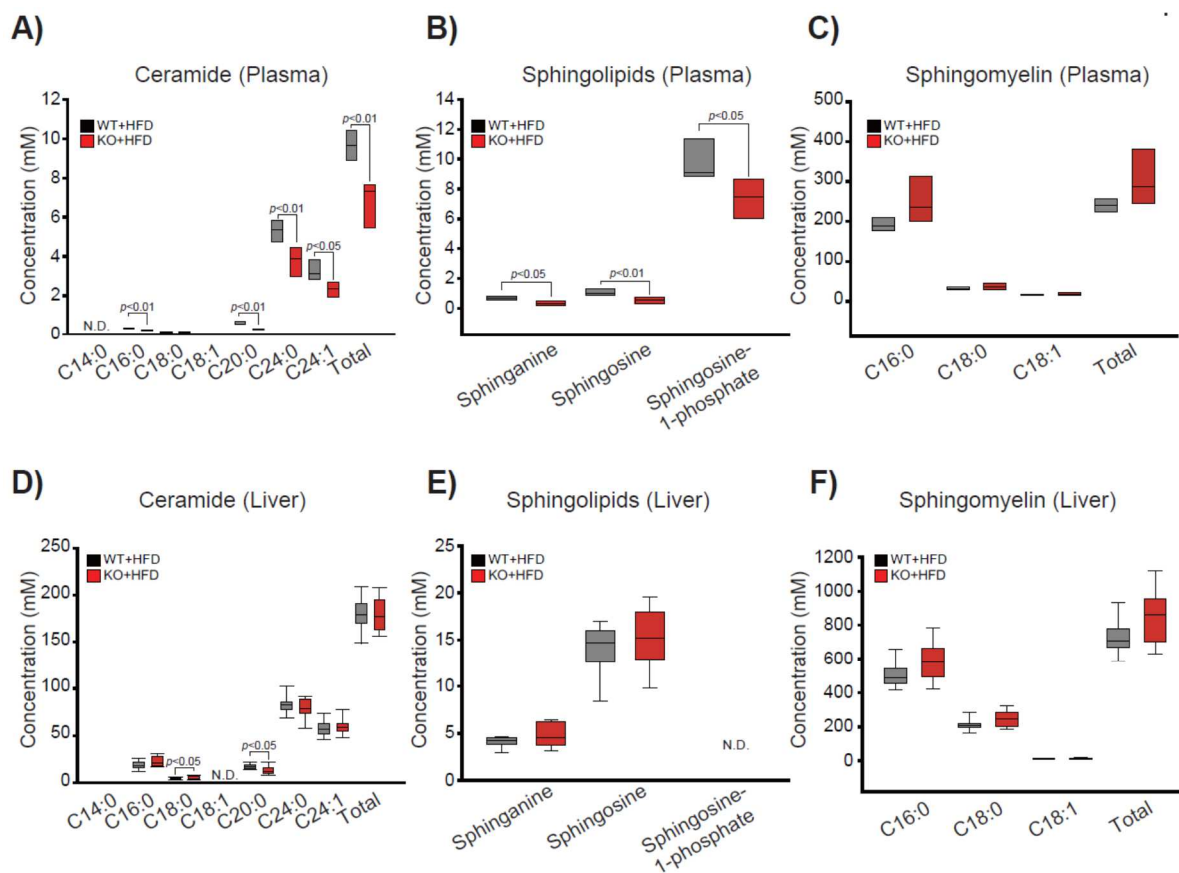

Fig.S5

402

403

404 **Supplemental Figure 5. Lipidomic analyses of plasma and liver samples from WT or *Gna12* KO**  
 405 **mice.**

406 (A-F) The samples were collected from WT and *Gna12* KO mice fed HFD for 16 weeks. The contents  
 407 of ceramides (A, D), sphingolipid bases (sphinganine, sphingosine, and sphingosine 1-phosphate) (B,  
 408 E), and sphingomyelin (C, F) were measured using LC-MS/MS method (n=5/group for plasma; n=9-  
 409 10/group for liver).

410 For A-F, values represent mean  $\pm$  SEM. Data were analyzed by two-tailed Student's *t* test. Box-and-  
 411 whisker plots show median (horizontal lines within boxes), 5-95% percentile (the bounds of the  
 412 boxes), and range of minimum to maximum values (whiskers).

413

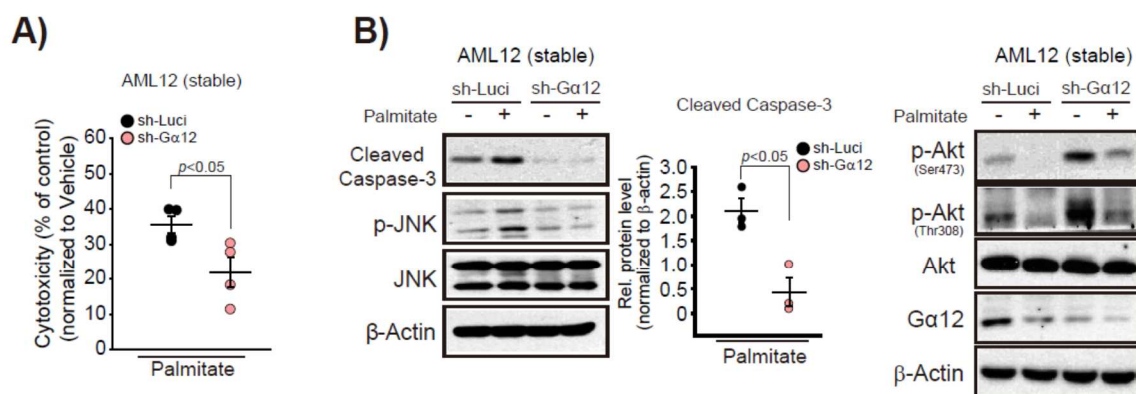

Fig.S6

414

415 **Supplemental Figure 6. The effect of  $G\alpha_{12}$  gene knockdown on the viability of AML12 cells**  
 416 **treated with palmitate**

417 (A) Cell viability assay. AML12 cells stably expressing sh- $G\alpha_{12}$  (or sh-Luci) were treated with 500  
 418  $\mu$ M palmitate for 48 h, and cell viability was analyzed by MTT assay. The result shown represents  
 419 four independent experiments (n=4-6 replicates/group for each experiment).

420 (B) Immunoblottings for cell death-related markers. AML12 cells stably expressing sh- $G\alpha_{12}$  (or sh-  
 421 Luci) were treated with 500  $\mu$ M palmitate for 36 h. The blots were run in parallel using same samples  
 422 and  $\beta$ -actin was used as a normalization control for densitometric analysis of cleaved caspase-3  
 423 (middle, n=3).

424 Values represent mean  $\pm$  SEM. Data were analyzed by two-tailed Student's *t* test (A and B).

425

426

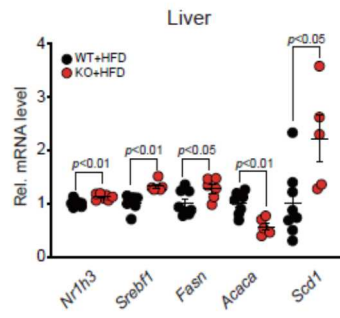

Fig.S7

427

428 **Supplemental Figure 7. The effects of *Gna12* KO on lipogenic gene expression**

429 qRT-PCR assays for lipogenic genes in the liver of mice as described in Figure 7F (n=5-8/group).

430 Values represent mean ± SEM. Data were analyzed by two-tailed Student's *t* test.

431

432

433

434

435

436

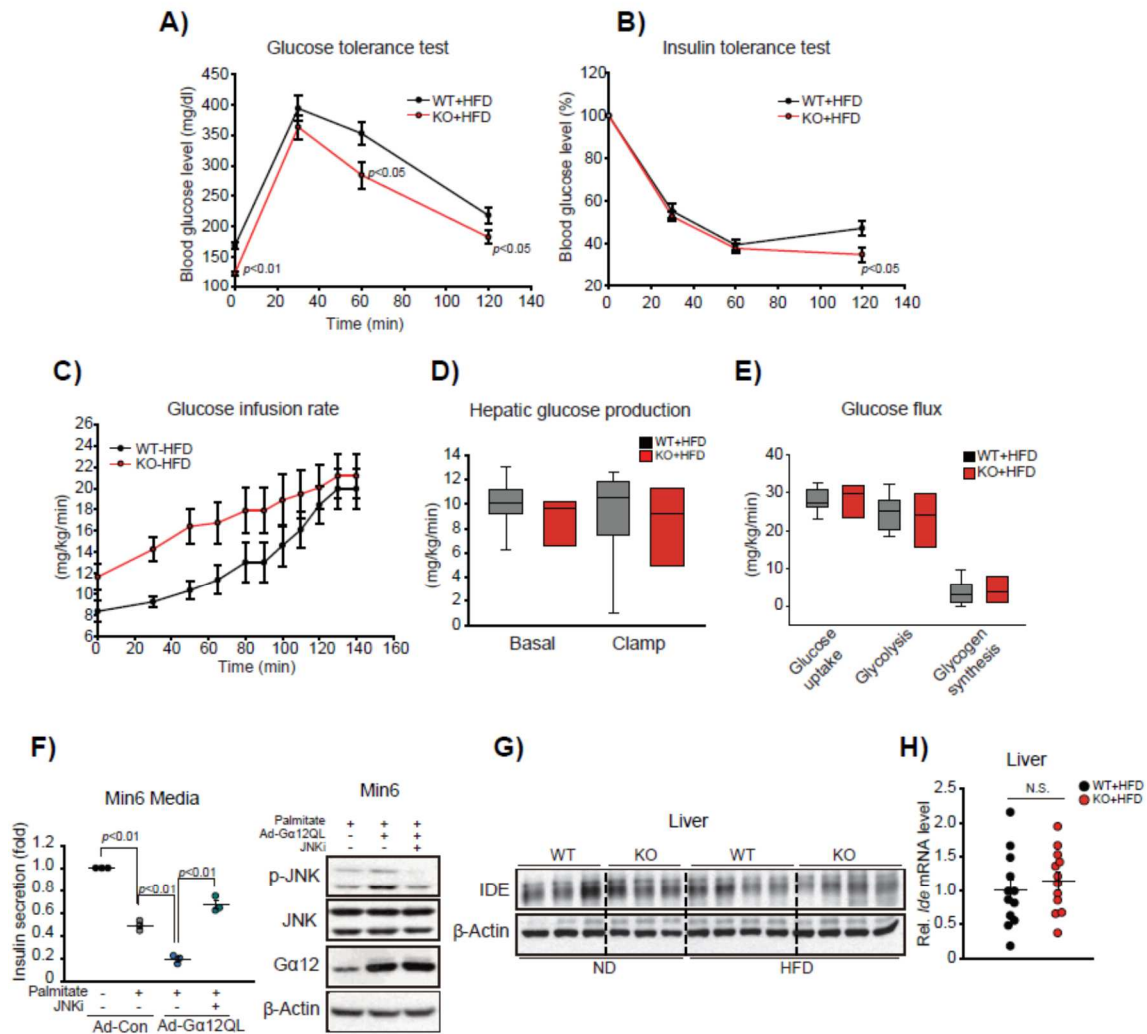

Fig.S8

437

438 **Supplemental Figure 8. The effect of *Gna12* KO on glucose metabolism**

439 (A) Glucose tolerance tests. Eight-week-old WT or *Gna12* KO mice fed HFD for 13 weeks were  
 440 subjected to blood glucose measurements (n=9-10/group).

441 (B) Insulin tolerance tests. WT and *Gna12* KO mice were fed HFD for 15 weeks (n=12-14/group).

442 (C) Glucose infusion rates. Hyperinsulinemic-euglycemic clamp was conducted on WT or *Gna12* KO  
 443 mice fed HFD for 6 weeks (n=7-9/group).

444 (D) Hepatic glucose production rates in the same mice as in C (n=7-9/group).

445 (E) Glucose flux comprising glucose uptake, glycolysis, and glycogen synthesis in the same mice as  
 446 in C (n=7-9/group).

447 (F) Glucose-stimulated insulin secretion assay. Min6 cells infected with Ad-Gα<sub>12</sub>QL (or Ad-Con)  
 448 were treated with 500 μM palmitate with or without chemical JNK inhibitor (SP600125, 20 μM) for

449 24 h, followed by stimulation with high glucose (25 mM, 1 h). The content of insulin secreted into the  
450 culture media for each sample was measured by ELSIA assay and was normalized to cellular protein  
451 concentration (left). The ELISA result represents three independent experiments (n=4 replicates/group  
452 for each experiment). Immunoblottings were done using cell lysates prepared from the assay (right).  
453 **(G)** Immunoblotting for IDE in the liver of WT or *Gna12* KO mice fed either ND or HFD for 16  
454 weeks.  
455 **(H)** qRT-PCR assay for *Ide* in the liver of mice as in **G** (n=12/group).  
456 Values represent the mean  $\pm$  SEM. Data were analyzed by two-tailed Student's *t* test (**A** and **B**) or  
457 ANOVA followed by Bonferroni (**F**) post hoc test. For **D** and **E**, box-and-whisker plots show median  
458 (horizontal lines within boxes), 5-95% percentile (the bounds of the boxes), and range of minimum to  
459 maximum values (whiskers). For **F** and **G**, the blots were run in parallel using same samples. N.S., not  
460 significant  
461  
462  
463  
464  
465

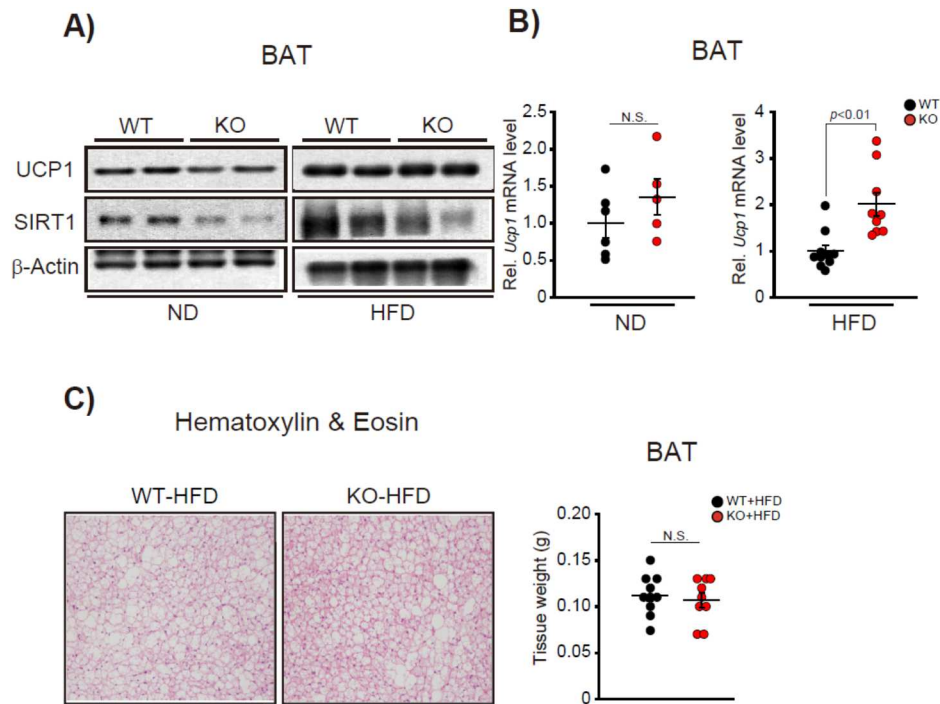

Fig.S9

466

467 **Supplemental Figure 9. The effects of *Gna12* KO on the genes in brown adipose tissue**

468 (A) Immunoblottings for UCP1 and SIRT1 in the homogenates of brown adipose tissue (BAT) from  
 469 WT or *Gna12* KO mice fed either ND or HFD for 16 weeks. The blots were run in parallel using same  
 470 samples.

471 (B) qRT-PCR assays for *Ucp1* in the above samples (n=5-10/group).

472 (C) Representative H&E staining of BAT (left, n=3/group), and tissue weights (right, n=9-10/group).

473 Values represent mean  $\pm$  SEM. Data were analyzed by two-tailed Student's *t* test (B). N.S., not  
 474 significant

475

476



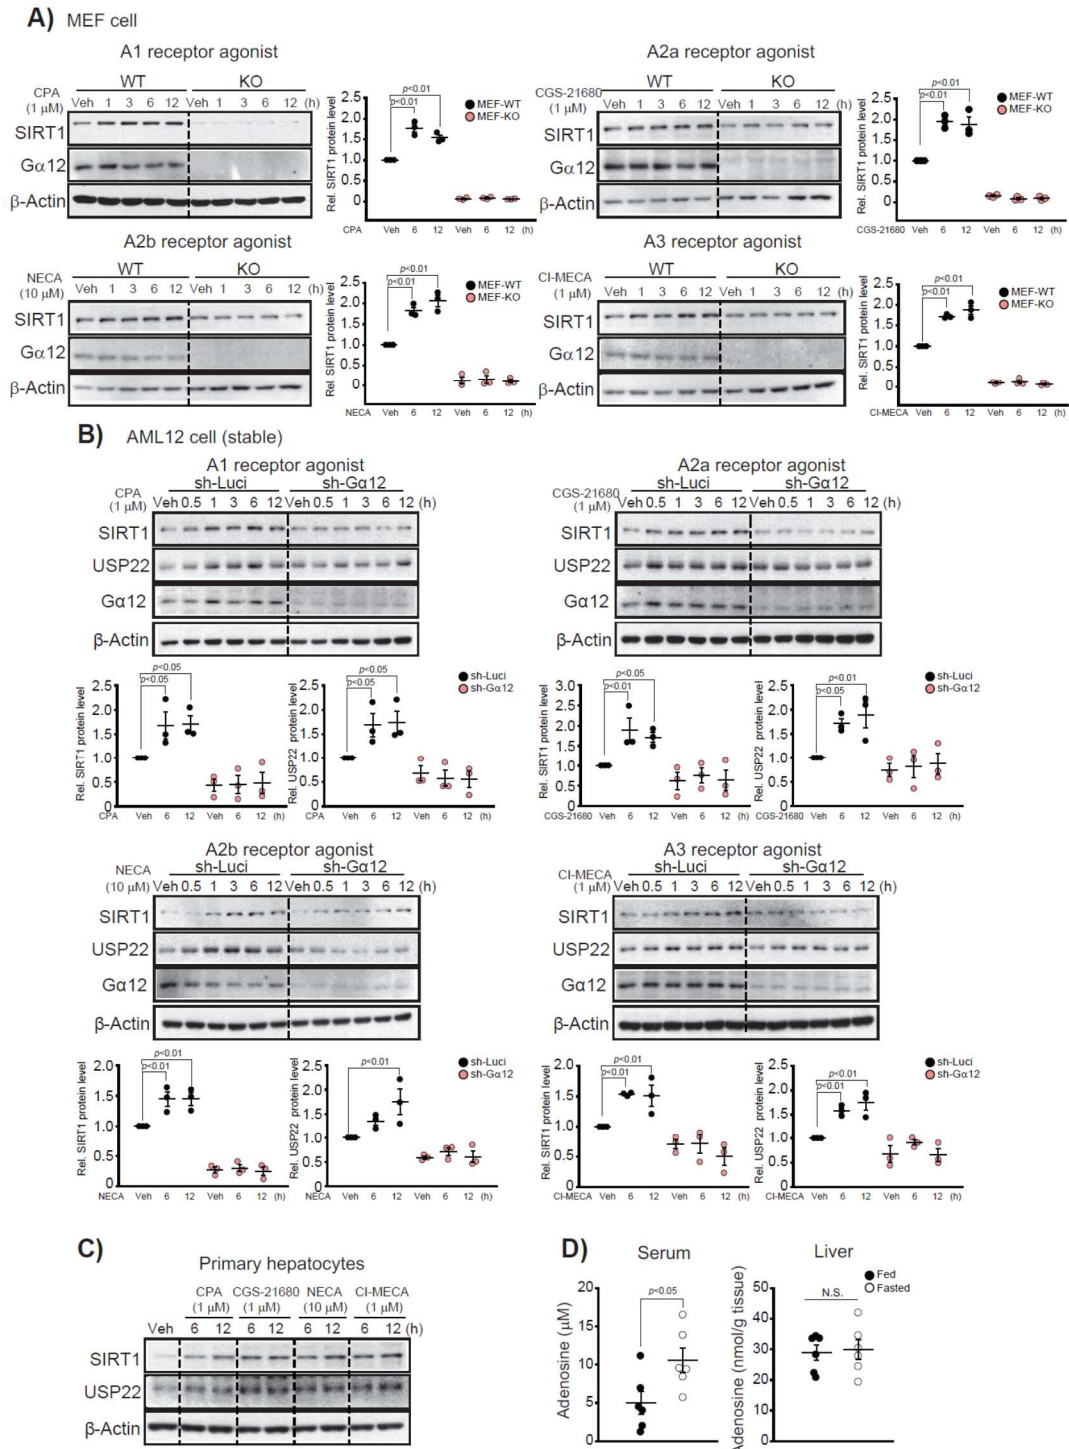

Fig.S10

477

478 **Supplemental Figure 10. The role of G $\alpha$ <sub>12</sub> in the induction of SIRT1 by adenosine signaling**

479 (A) Immunoblottings for SIRT1 in MEF cells treated with each agonist for adenosine receptors (CPA,  
480 1  $\mu$ M; CGS-21680, 1  $\mu$ M; NECA, 10  $\mu$ M; and CI-IB-MECA, 1  $\mu$ M) for the indicated times (left), and  
481 their respective quantifications (right, n=3/group).

482 (B) Immunoblottings for SIRT1 and USP22 in AML12 cells stably expressing shRNA against G $\alpha$ <sub>12</sub>

483 (sh-G $\alpha_{12}$ ) or control luciferase (sh-Luci) treated with reagents as in **A** (upper), and their respective  
484 quantifications (lower, n=3/group).  
485 **(C)** Immunoblottings for SIRT1 and USP22 in mouse primary hepatocytes treated with reagents as in  
486 **A**.  
487 **(D)** Adenosine concentrations in sera or liver homogenates from WT mice fasted for 24 h (n=6/group).  
488 Values represent mean  $\pm$  SEM. Data were analyzed by ANOVA followed by LSD (**A** and **B**) post hoc  
489 test or two-tailed Student's *t* test (**D**). For **A-C**, the blots were run in parallel using same samples  
490 and  $\beta$ -actin was used as a normalization control for densitometric analysis. N.S., not significant  
491

492 Supplemental Table 1. The sequences of primer pairs for qRT-PCR assays

| Gene names                                               | Pairs      | Primer sequences (mouse)         |
|----------------------------------------------------------|------------|----------------------------------|
| ACC<br>(Acetyl-CoA carboxylase)                          | sense      | 5'-GTCAGCGGATGGGCGGAATG-3'       |
|                                                          | anti-sense | 5'-CGCCGGATGCCATGCTCAAC-3'       |
| $\beta$ -actin                                           | sense      | 5'-CTGAGAGGGAAATCGTGCGT-3'       |
|                                                          | anti-sense | 5'-TGTTGGCATAGAGGTC'TTACGG-3'    |
| CD36                                                     | sense      | 5'-GATGACGTGGCAAAGAACAG-3'       |
|                                                          | anti-sense | 5'-TCCTCGGGGTCCTGAGTTAT-3'       |
| CPT1                                                     | sense      | 5'-GTCGCTTCTCAAGGTCTGG-3'        |
|                                                          | anti-sense | 5'-AAGAAAGCAGCACGTTTCGAT-3'      |
| FAS<br>(Fatty acid synthase)                             | sense      | 5'-AGCGCCATTTCCATTGCC-3'         |
|                                                          | anti-sense | 5'-CCATGCCAGAGGGTGGTTG-3'        |
| GAPDH<br>(Glyceraldehyde-3-phosphate dehydrogenase)      | sense      | 5'-AACGACCCCTTCATTGAC-3'         |
|                                                          | anti-sense | 5'-TCCACGACATACTCAGCAC-3'        |
| IDE<br>(Insulin degrading enzyme)                        | sense      | 5'-AGTCCTGTGTGTCCTTGG-3'         |
|                                                          | anti-sense | 5'-CACTTGCAGGAAAGCCTGAGTA-3'     |
| Acadl<br>(Acyl-Coenzyme A dehydrogenase, long chain)     | sense      | 5-GCATCAACATCGCAGAGAAA-3'        |
|                                                          | anti-sense | 5-GGCTATGGCACCGATACT-3'          |
| LPL<br>(Lipoprotein lipase)                              | sense      | 5'-CCCTACAAAGTGTTCATTA-3'        |
|                                                          | anti-sense | 5'-CTCGCTCTCGGCCACTGT-3'         |
| LXR $\alpha$<br>(Liver X receptor)                       | sense      | 5'-TGCCATCAGCATCTTCTTG-3'        |
|                                                          | anti-sense | 5'-GGCTACCAGCTTCATTAGC-3'        |
| Acadm<br>(Acyl-Coenzyme A dehydrogenase, medium chain)   | sense      | 5'-TTGAGTTGACGGAACAGCAG-3'       |
|                                                          | anti-sense | 5'-CCCCAAAGAATTTGCTTCAA-3'       |
| PGC1 $\alpha$                                            | sense      | 5'-ACGAGCCAGTCCTTCTCC-3'         |
|                                                          | anti-sense | 5'-AGCTCTGAGCAGGGACGTCT-3'       |
| PPAR $\alpha$                                            | sense      | 5'-CGGAAAGACCAGCAACAAC-3'        |
|                                                          | anti-sense | 5'-TGGCAGCAGTGAAGAATCG-3'        |
| PPAR $\gamma$                                            | sense      | 5'-GTTTTATGCTGTTATGGGTG-3'       |
|                                                          | anti-sense | 5'-GTAATTTCTTGTGAAGTGCT-3'       |
| PPAR $\delta$                                            | sense      | 5'-CGGACCTGGGGATTAATGGG-3'       |
|                                                          | anti-sense | 5'-ATGGACTGCC'TTACCGTGG-3'       |
| SCD1<br>(Stearoyl-CoA desaturase-1)                      | sense      | 5'-CCGGAGACCCTTAGATCGA-3'        |
|                                                          | anti-sense | 5'-TAGCCTGTAAAAGATTTCTGCAAACC-3' |
| SIRT1                                                    | sense      | 5'-CAGTGTGATGGTTCCTTTGC-3'       |
|                                                          | anti-sense | 5'-CACCGAGGAACCTACCTGAT-3'       |
| SREBP-1<br>(Sterol regulatory element binding protein-1) | sense      | 5'-AACGTCACCTCCAGCTAGAC-3'       |
|                                                          | anti-sense | 5'-CCACTAAGGTGCCTACAGAGC-3'      |
| UCP1<br>(Uncoupling protein 1)                           | sense      | 5'-CTGGGCTAACGGGTCCTC-3'         |
|                                                          | anti-sense | 5'-CTGGGCTAGGTAGTGCCAGT-3'       |
| USP22                                                    | sense      | 5'-TCTACCAGTGCTTCGTGTGG-3'       |

493

|  |            |                            |
|--|------------|----------------------------|
|  | anti-sense | 5'-CATGGTCATGGATGTGCTTC-3' |
|--|------------|----------------------------|
